# Supplementary material
Source: PubMed Central journal article supplement (PMC153749)
Supplement: nar_31_8_2134__1.pdf [file nar_31_8_2134__1.pdf]

**Table S1.** Proteins unique to *C.caviae* (BSR < 0.1;  $P < 1 \times 10^{-5}$ ) (A), *C.caviae* proteins highly conserved in other Chlamydiaceae genomes (BSR > 0.8;  $P < 1 \times 10^{-5}$ ) (B), proteins with greater homology to *C.pneumoniae* (BSR > 0.1;  $P < 1 \times 10^{-5}$ ) (C) and *C.caviae* proteins more similar to *Chlamydia* spp. than *C.pneumoniae* (D)

| Locus    | Description                                |
|----------|--------------------------------------------|
| (A)      |                                            |
| CCA00062 | Conserved hypothetical protein             |
| CCA00203 | Thiamine-phosphate pyrophosphorylase       |
| CCA00204 | Hydroxyethylthiazole kinase                |
| CCA00245 | Conserved hypothetical protein             |
| CCA00296 | Conserved hypothetical protein             |
| CCA00297 | Conserved hypothetical protein             |
| CCA00298 | Exodeoxyribonuclease                       |
| CCA00306 | Conserved hypothetical protein             |
| CCA00335 | Conserved hypothetical protein             |
| CCA00351 | Conserved hypothetical protein             |
| CCA00352 | Conserved hypothetical protein             |
| CCA00353 | Conserved hypothetical protein             |
| CCA00361 | Conserved hypothetical protein             |
| CCA00389 | Conserved hypothetical protein             |
| CCA00398 | Conserved hypothetical protein             |
| CCA00425 | Conserved hypothetical protein             |
| CCA00434 | Conserved hypothetical protein             |
| CCA00500 | Conserved hypothetical protein             |
| CCA00515 | Conserved hypothetical protein             |
| CCA00526 | Conserved hypothetical protein (TIGR01125) |
| CCA00538 | Conserved hypothetical protein             |
| CCA00559 | Tryptophan synthase                        |
| CCA00563 | Phosphoribosylanthranilate transferase     |
| CCA00564 | Indole-3-glycerol phosphate synthase       |
| CCA00568 | Kynureninase                               |
| CCA00569 | Ribose-phosphate pyrophosphokinase         |
| CCA00579 | Conserved hypothetical protein             |
| CCA00586 | Conserved hypothetical protein             |
| CCA00627 | ABC transporter                            |
| CCA00628 | Conserved hypothetical protein (TIGR00056) |
| CCA00636 | Conserved hypothetical protein             |

---

|            |                                              |
|------------|----------------------------------------------|
| CCA00639   | Conserved hypothetical protein               |
| CCA00647   | Conserved domain protein                     |
| CCA00718   | Conserved hypothetical protein               |
| CCA00719   | Short chain dehydrogenase                    |
| CCA00803   | Conserved hypothetical protein               |
| CCA00814   | Conserved hypothetical protein               |
| CCA00824   | Conserved hypothetical protein               |
| <b>(B)</b> |                                              |
| CCA00019   | ABC transporter                              |
| CCA00035   | Type III secretion cytoplasmic ATPase (SctN) |
| CCA00040   | Type III secretion protein (SctC)            |
| CCA00048   | PBP2-transglycolase/transpeptidase           |
| CCA00073   | DNA polymerase III                           |
| CCA00077   | Aspartyl-tRNA synthetase                     |
| CCA00096   | Ribosomal protein L2                         |
| CCA00097   | Ribosomal protein S19                        |
| CCA00100   | Ribosomal protein L16                        |
| CCA00103   | Ribosomal protein L14                        |
| CCA00105   | Ribosomal protein L5                         |
| CCA00109   | Ribosomal protein S5                         |
| CCA00123   | Glucose inhibited division protein A         |
| CCA00128   | DNA polymerase I                             |
| CCA00130   | Transcription termination factor Rho         |
| CCA00142   | Peptide ABC transporter                      |
| CCA00178   | secDF protein                                |
| CCA00191   | Ribosomal protein S7                         |
| CCA00192   | Translation elongation factor G              |
| CCA00205   | Polymorphic membrane protein B/C family      |
| CCA00211   | Transcriptional regulator                    |
| CCA00212   | Conserved hypothetical protein (TIGR00244)   |
| CCA00224   | Serine hydroxymethyltransferase              |
| CCA00232   | Conserved hypothetical protein               |
| CCA00240   | Exoribonuclease                              |
| CCA00241   | DnaK protein                                 |
| CCA00268   | 1-4-alpha-glucan branching enzyme            |
| CCA00301   | Conserved hypothetical protein               |
| CCA00312   | Conserved hypothetical protein               |
| CCA00315   | ABC transporter                              |
| CCA00319   | ATP-dependent protease La                    |

---

---

|          |                                                  |
|----------|--------------------------------------------------|
| CCA00324 | 2-Oxoisovalerate dehydrogenase                   |
| CCA00355 | ATP-dependent Clp protease                       |
| CCA00368 | Chromosomal replication initiator protein (DnaA) |
| CCA00374 | Penicillin-binding protein                       |
| CCA00378 | Integration host factor beta-subunit             |
| CCA00380 | Acetyl-CoA carboxylase                           |
| CCA00388 | Enoyl-(acyl-carrier protein) reductase           |
| CCA00404 | Deoxycytidine triphosphate deaminase             |
| CCA00408 | Glycosyl hydrolase family protein                |
| CCA00420 | 2-Oxoglutarate dehydrogenase                     |
| CCA00433 | GTP-binding protein (Lepa)                       |
| CCA00445 | DNA polymerase III                               |
| CCA00459 | Type III secretion inner membrane protein (SctV) |
| CCA00465 | Translation initiation factor 2                  |
| CCA00466 | N utilization substance protein A                |
| CCA00472 | Inner membrane protein                           |
| CCA00475 | Glycogen phosphorylase                           |
| CCA00482 | Outer membrane protein                           |
| CCA00489 | Conserved hypothetical protein                   |
| CCA00496 | Magnesium transporter                            |
| CCA00499 | Fructose-bisphosphate aldolase class I           |
| CCA00506 | DNA gyrase                                       |
| CCA00507 | DNA gyrase                                       |
| CCA00552 | Translation elongation factor P                  |
| CCA00612 | Leucyl-tRNA synthetase                           |
| CCA00625 | ATP-dependent Clp protease                       |
| CCA00643 | 60 kDa chaperonin                                |
| CCA00664 | Isoleucyl-tRNA synthetase                        |
| CCA00676 | Excinuclease ABC                                 |
| CCA00677 | Serine/threonine-protein kinase                  |
| CCA00678 | Valyl-tRNA synthetase                            |
| CCA00683 | ATP synthase                                     |
| CCA00684 | ATP synthase                                     |
| CCA00690 | DNA-directed RNA polymerase                      |
| CCA00691 | DNA-directed RNA polymerase                      |
| CCA00694 | Ribosomal protein L1                             |
| CCA00698 | Translation elongation factor Tu                 |
| CCA00699 | Translation initiation factor IF-1               |
| CCA00730 | Conserved hypothetical protein                   |

---

---

|          |                                                                                          |
|----------|------------------------------------------------------------------------------------------|
| CCA00761 | Ribosomal protein S15                                                                    |
| CCA00762 | Polyribonucleotide nucleotidyltransferase                                                |
| CCA00763 | Cell division protein (FtsH)                                                             |
| CCA00770 | Ribosomal protein L35                                                                    |
| CCA00776 | Ribonucleoside-diphosphate reductase beta                                                |
| CCA00777 | Ribonucleoside-diphosphate reductase alpha                                               |
| CCA00780 | Metalloprotease                                                                          |
| CCA00810 | Ribonuclease G                                                                           |
| CCA00823 | Glycyl-tRNA synthetase                                                                   |
| CCA00829 | DNA mismatch repair protein MutS                                                         |
| CCA00853 | 3-Oxoacyl-(acyl-carrier-protein) synthase II                                             |
| CCA00863 | UDP- <i>N</i> -acetylmuramate–alanineligase/ <i>D</i> -alanine– <i>D</i> -alanine ligase |
| CCA00873 | Translation elongation factor P                                                          |
| CCA00875 | Transketolase                                                                            |
| CCA00876 | Alanyl-tRNA synthetase                                                                   |
| CCA00877 | Transcription-repair coupling factor                                                     |
| CCA00885 | NADH:ubiquinone oxidoreductase                                                           |
| CCA00887 | Cell division protein (FtsK)                                                             |
| CCA00899 | Cation-transporting ATPase                                                               |
| CCA00916 | Phosphoenolpyruvate carboxykinase                                                        |
| CCA00917 | Cell shape-determining protein (MreB)                                                    |
| CCA00918 | Helicase                                                                                 |
| CCA00920 | ATP-dependent Clp protease                                                               |
| CCA00925 | Preprotein translocase                                                                   |
| CCA00931 | Helicase                                                                                 |
| CCA00948 | General secretion pathway protein D                                                      |
| CCA00957 | Threonyl-tRNA synthetase                                                                 |
| CCA00958 | Chromosome partitioning ATPase (ParA)                                                    |
| CCA00962 | Excinuclease ABC                                                                         |
| CCA00966 | Conserved hypothetical protein                                                           |
| CCA00968 | Succinate dehydrogenase                                                                  |
| CCA00988 | DNA topoisomerase I                                                                      |
| (C)      |                                                                                          |
| CCA00014 | Conserved hypothetical protein                                                           |
| CCA00015 | Conserved hypothetical protein                                                           |
| CCA00024 | Conserved hypothetical protein                                                           |
| CCA00025 | Conserved hypothetical protein                                                           |
| CCA00028 | Glutamyl-tRNA reductase                                                                  |
| CCA00039 | Serine/threonine-protein kinase                                                          |

---

---

|          |                                               |
|----------|-----------------------------------------------|
| CCA00042 | Conserved hypothetical protein                |
| CCA00052 | Conserved hypothetical protein                |
| CCA00092 | Conserved hypothetical protein                |
| CCA00118 | Conserved hypothetical protein                |
| CCA00131 | Conserved hypothetical protein                |
| CCA00132 | Orotate phosphoribosyltransferase             |
| CCA00139 | Conserved hypothetical protein                |
| CCA00145 | DNA methyltransferase                         |
| CCA00154 | Conserved hypothetical protein                |
| CCA00168 | Conserved hypothetical protein                |
| CCA00177 | Conserved hypothetical protein                |
| CCA00180 | Conserved hypothetical protein                |
| CCA00188 | Conserved hypothetical protein                |
| CCA00189 | Conserved hypothetical protein                |
| CCA00196 | Conserved hypothetical protein                |
| CCA00221 | Conserved hypothetical protein                |
| CCA00222 | Conserved hypothetical protein                |
| CCA00239 | DNA-3-methyladenine glycosylase               |
| CCA00246 | Conserved hypothetical protein                |
| CCA00258 | Sodium/pantothenate symporter                 |
| CCA00259 | Conserved hypothetical protein                |
| CCA00261 | Conserved hypothetical protein                |
| CCA00266 | Conserved hypothetical protein (TIGR00089)    |
| CCA00271 | Polymorphic outer membrane protein E/F family |
| CCA00272 | Polymorphic outer membrane protein E/F family |
| CCA00273 | Polymorphic outer membrane protein E/F family |
| CCA00280 | Polymorphic membrane protein G family         |
| CCA00281 | Polymorphic membrane protein G family         |
| CCA00282 | Polymorphic outer membrane protein G family   |
| CCA00284 | Polymorphic membrane protein G family         |
| CCA00290 | Conserved hypothetical protein                |
| CCA00291 | Conserved hypothetical protein                |
| CCA00299 | Conserved hypothetical protein                |
| CCA00300 | Conserved hypothetical protein                |
| CCA00325 | Conserved hypothetical protein                |
| CCA00327 | Conserved hypothetical protein                |
| CCA00333 | Conserved hypothetical protein                |
| CCA00343 | Conserved hypothetical protein                |
| CCA00358 | Conserved hypothetical protein                |

---

---

|          |                                                     |
|----------|-----------------------------------------------------|
| CCA00360 | Conserved hypothetical protein                      |
| CCA00375 | Conserved hypothetical protein                      |
| CCA00386 | Conserved hypothetical protein                      |
| CCA00412 | Hc2 nucleoprotein                                   |
| CCA00426 | Conserved hypothetical protein                      |
| CCA00439 | ABC transporter                                     |
| CCA00450 | LtuB protein                                        |
| CCA00470 | Conserved hypothetical protein                      |
| CCA00471 | Prolipoprotein diacylglyceryl transferase           |
| CCA00491 | Inclusion membrane protein B                        |
| CCA00495 | Conserved hypothetical protein                      |
| CCA00497 | Conserved hypothetical protein                      |
| CCA00501 | ABC transporter                                     |
| CCA00502 | ABC transporter                                     |
| CCA00503 | Lipoprotein                                         |
| CCA00525 | Conserved hypothetical protein                      |
| CCA00530 | Conserved hypothetical protein                      |
| CCA00537 | Conserved hypothetical protein                      |
| CCA00543 | Arginine repressor                                  |
| CCA00546 | Conserved hypothetical protein                      |
| CCA00561 | Conserved hypothetical protein                      |
| CCA00575 | Conserved hypothetical protein                      |
| CCA00576 | Conserved hypothetical protein                      |
| CCA00582 | Conserved hypothetical protein                      |
| CCA00583 | Conserved hypothetical protein                      |
| CCA00591 | Conserved hypothetical protein                      |
| CCA00593 | 5'-Methylthioadenosine nucleosidase-related protein |
| CCA00616 | Conserved hypothetical protein                      |
| CCA00619 | Conserved domain protein                            |
| CCA00620 | Conserved domain protein                            |
| CCA00621 | Conserved domain protein                            |
| CCA00624 | Polymorphic outer membrane protein G family         |
| CCA00665 | Conserved hypothetical protein                      |
| CCA00700 | Conserved hypothetical protein                      |
| CCA00709 | Conserved hypothetical protein                      |
| CCA00716 | Conserved hypothetical protein                      |
| CCA00717 | Conserved hypothetical integral membrane protein    |
| CCA00721 | Structural protein                                  |
| CCA00722 | Nonstructural protein                               |

---

---

|          |                                                    |
|----------|----------------------------------------------------|
| CCA00726 | 3-Dehydroquinase synthase                          |
| CCA00733 | Conserved hypothetical protein                     |
| CCA00738 | Conserved hypothetical protein                     |
| CCA00743 | Conserved hypothetical protein                     |
| CCA00753 | Conserved hypothetical protein                     |
| CCA00754 | Conserved hypothetical protein                     |
| CCA00781 | Peptidase M20/M25/M40 superfamily                  |
| CCA00805 | Conserved hypothetical protein                     |
| CCA00826 | Conserved hypothetical protein                     |
| CCA00827 | Conserved hypothetical protein                     |
| CCA00855 | Conserved hypothetical protein                     |
| CCA00861 | Periplasmic divalent cation tolerance protein      |
| CCA00862 | KH domain protein                                  |
| CCA00883 | RNA methyltransferase                              |
| CCA00902 | Conserved hypothetical protein                     |
| CCA00907 | Secretory protein                                  |
| CCA00910 | Conserved hypothetical protein                     |
| CCA00943 | Conserved hypothetical protein                     |
| CCA00974 | Conserved hypothetical protein                     |
| CCA00991 | Conserved hypothetical protein                     |
| CCA00992 | Conserved hypothetical protein                     |
| CCA01006 | Conserved hypothetical protein                     |
| (D)      |                                                    |
| CCA00071 | TPR domain protein                                 |
| CCA00150 | Conserved hypothetical protein                     |
| CCA00237 | Conserved hypothetical protein                     |
| CCA00292 | Conserved hypothetical protein FRAMESHIFT          |
| CCA00391 | Ribosomal large subunit pseudouridine synthase C   |
| CCA00392 | Adenine glycosylase                                |
| CCA00416 | Conserved hypothetical protein                     |
| CCA00417 | Conserved hypothetical protein                     |
| CCA00444 | recF protein                                       |
| CCA00558 | Adherence factor                                   |
| CCA00560 | MAC/perforin family protein (authentic frameshift) |
| CCA00565 | N-(5' phosphoribosyl)anthranilate isomerase        |
| CCA00572 | Adenosine/AMP deaminase superfamily                |
| CCA00573 | GMP synthase                                       |
| CCA00574 | Inosine-5'-monophosphate dehydrogenase             |
| CCA00670 | Cytochrome-D oxidase                               |

---

---

|          |                                                  |
|----------|--------------------------------------------------|
| CCA00706 | Conserved hypothetical protein                   |
| CCA00750 | Conserved hypothetical protein                   |
| CCA00815 | 4-Diphosphocytidyl-2C-methyl-D-erythritol kinase |
| CCA00924 | Conserved hypothetical protein                   |
| CCA01010 | Conserved hypothetical protein                   |

---

In all cases hypothetical genes with no homology to known genes have been excluded.
